# Supplementary material for: Word prediction using closely and moderately related verbs in Down syndrome
Source: Frontiers journal article supplement (doi:10.3389/fpsyg.2022.934826), 2022-10-03
Supplement: Table_5.pdf [file Table_5.pdf]

# Supplementary Appendix 4

## Association Strength Between Targets and Distractors

| CV |        |   | UV |   |    | MV     |   |   | UV |  |
|----|--------|---|----|---|----|--------|---|---|----|--|
| ID | T      | D | T  | D | ID | T      | D | T | D  |  |
| 1  | 6.451  | 0 | 0  | 0 | 15 | 0      | 0 | 0 | 0  |  |
| 2  | 90.322 | 0 | 0  | 0 | 16 | 0      | 0 | 0 | 0  |  |
| 3  | 87.096 | 0 | 0  | 0 | 17 | 12.903 | 0 | 0 | 0  |  |
| 4  | 80.645 | 0 | 0  | 0 | 18 | 0      | 0 | 0 | 0  |  |
| 5  | 90.322 | 0 | 0  | 0 | 19 | 0      | 0 | 0 | 0  |  |
| 6  | 19.354 | 0 | 0  | 0 | 20 | 0      | 0 | 0 | 0  |  |
| 7  | 6.451  | 0 | 0  | 0 | 21 | 0      | 0 | 0 | 0  |  |
| 8  | 58.064 | 0 | 0  | 0 | 22 | 0      | 0 | 0 | 0  |  |
| 9  | 70.967 | 0 | 0  | 0 | 23 | 0      | 0 | 0 | 0  |  |
| 10 | 0      | 0 | 0  | 0 | 24 | 16.129 | 0 | 0 | 0  |  |
| 11 | 3.225  | 0 | 0  | 0 | 25 | 3.225  | 0 | 0 | 0  |  |
| 12 | 96.774 | 0 | 0  | 0 | 26 | 12.903 | 0 | 0 | 0  |  |
| 13 | 0      | 0 | 0  | 0 | 27 | 0      | 0 | 0 | 0  |  |
| 14 | 64.516 | 0 | 0  | 0 | 28 | 0      | 0 | 0 | 0  |  |

Note. The ID corresponds to the sentences presented in Tables 2 and 3. CV: closely related verb; MV, moderately related verb; UV: unrelated verb; T, target; D, distractor.
